# Supplementary material for: Visualization of early and late molecular events associated with the development of Type I Diabetes using NMR spectroscopy
Source: Research Square preprint supplement (doi:10.21203/rs.3.rs-6068677/v1), 2025-03-27
Supplement: Supplementary file 1 [file 020e6e6b3f36c5b854e81f59.docx]

**Supplementary Information**

**Visualization of early and late molecular events associated with the development of Type I Diabetes using NMR spectroscopy**

Soumya Swastik Sahoo1, Shreyada N. Save2, Shantanu Madiwale,2 Shilpy Sharma2,*, and Jeetender Chugh1,*

1Department of Chemistry, Indian Institute of Science Education and Research, Dr Homi Bhabha Road, Pashan, Pune 411008

2Department of Biotechnology, Savitribai Phule Pune University, Ganeshkhind Road, Pune 411007

***Address for correspondence**

Dr. Jeetender Chugh

**Postal address**: C-115, Department of Chemistry, Main Building, Indian Institute of Science Education and Research (IISER), Dr. Homi Bhabha Road, Pashan, Pune 411008, India

**E-mail**: [cjeet@iiserpune.ac.in](mailto:cjeet@iiserpune.ac.in)

**Phone**: +91-20-25908121

Dr. Shilpy Sharma

**Postal address**: Department of Biotechnology, Savitribai Phule Pune University, Ganeshkhind Road, Pune 411007

**E-mail**: [shilpy.sharma@gmail.com](mailto:shilpy.sharma@gmail.com); [ssharma@unipune.ac.in](mailto:shilpys@unipune.ac.in)

**Phone**: +91-20-25622228

**Figure S1**:Representative 1H NMR spectrum of serum obtained from control C57BL/6 mice. The chemical shifts have been used to assign the metabolites. 1) 2-hydroxybutyrate; 2) 2-hydroxyisovalerate; 3) 3-hydroxybutyrate; 4) Acetate; 5) Alanine; 6) Asparagine; 7) Aspartate; 8) Betaine; 9) Choline; 10) Citrate; 11) Creatine; 12) Cysteine; 13) DSS; 14) Ethanol; 15) Ethanolamine; 16) Formate; 17) Fumarate; 18) Glucose; 19) Glutamate; 20) Glutamine; 21) Glutathione; 22) Glycerol; 23) Glycine; 24) Histamine; 25) Histidine; 26) Imidazole; 27) Isobutyrate; 28) Isoleucine; 29) Lactate; 30) Leucine; 31) Lysine; 32) Mannose; 33) Methanol; 34) Methionine; 35) myo-Inositol; 36) o-Phosphocholine; 37) Phenylalanine; 38) Proline; 39) Pyroglutamate; 40) Pyruvate; 41) Sarcosine; 42) Serine; 43) sn-Glycero-3-phosphocholine; 44) Succinate; 45) Taurine; 46) Threonine; 47) Trimethylamine; 48) Tryptophan; 49) Tyrosine; 50) Uracil; 51) Uridine; 52) Valine. The corresponding chemical shift values for each of the identified metabolites have been listed in Table S1.


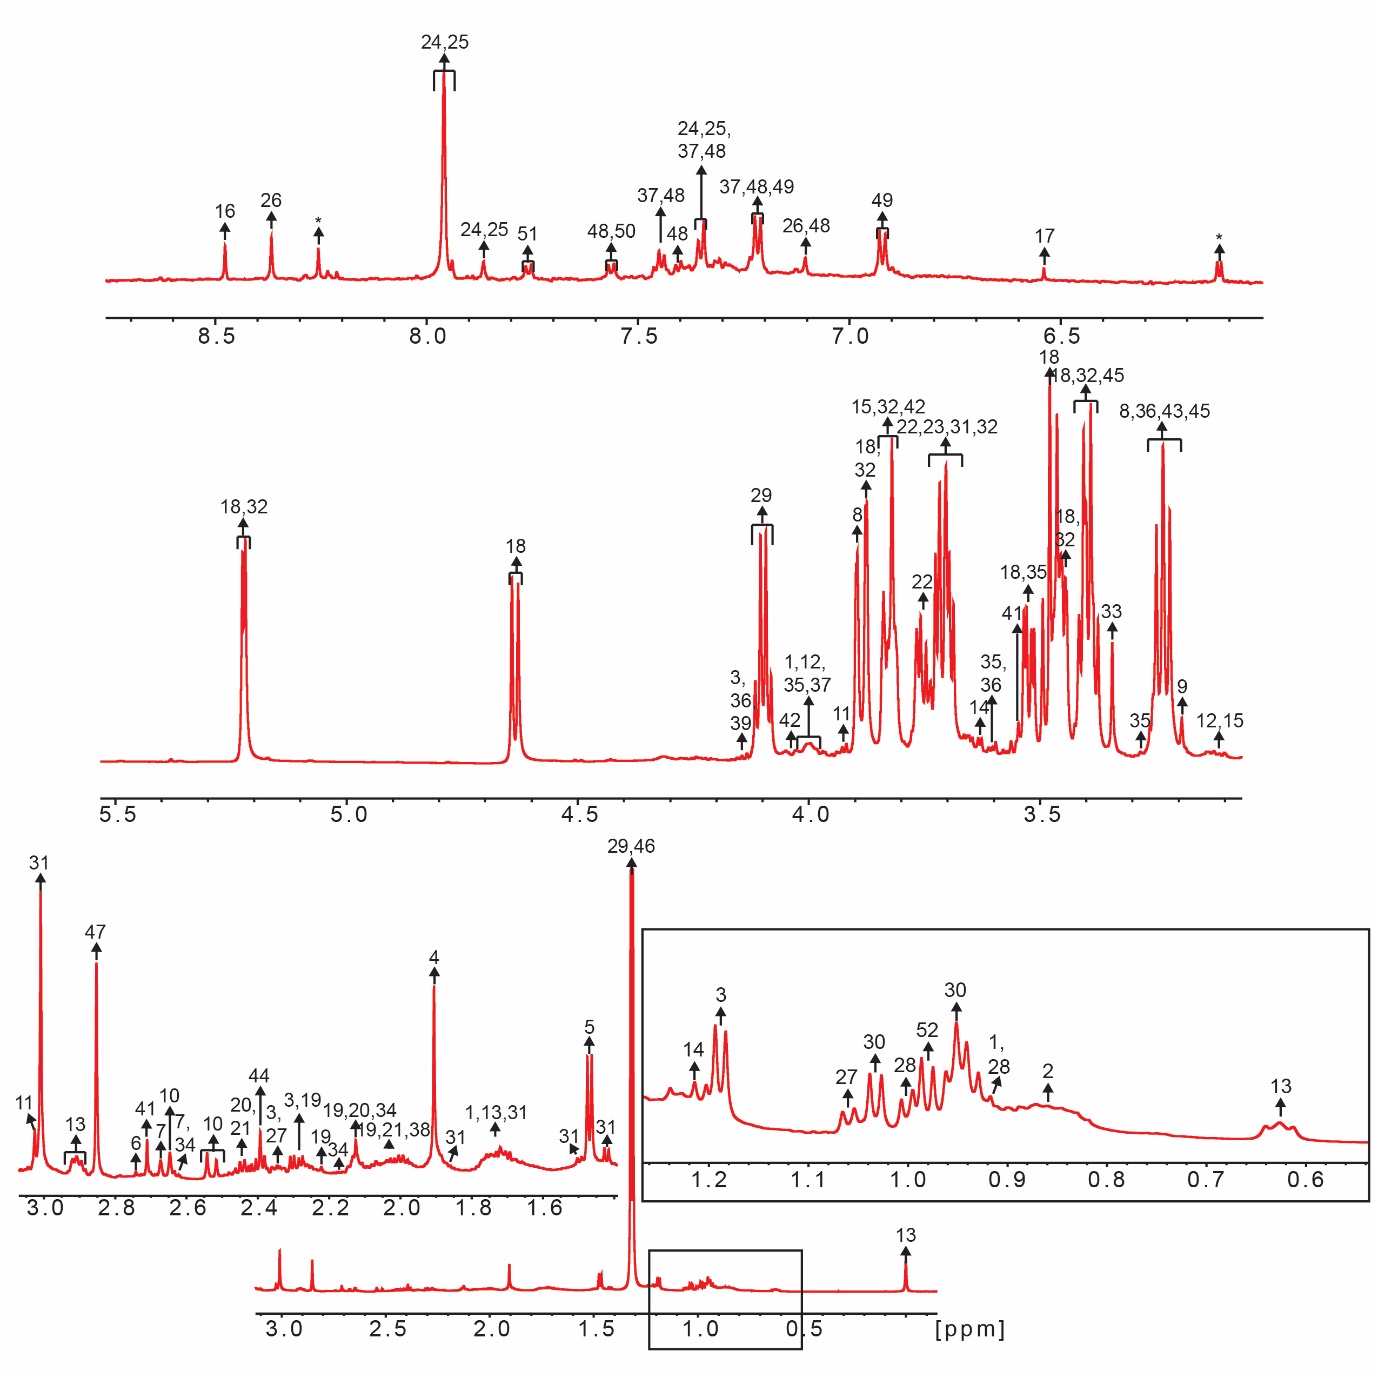


**Figure S2**: 2D 1H-1H TOCSY correlation spectrum of serum obtained from control C57BL/6 mice. The cross-peaks have been depicted for a few representative metabolites.

**
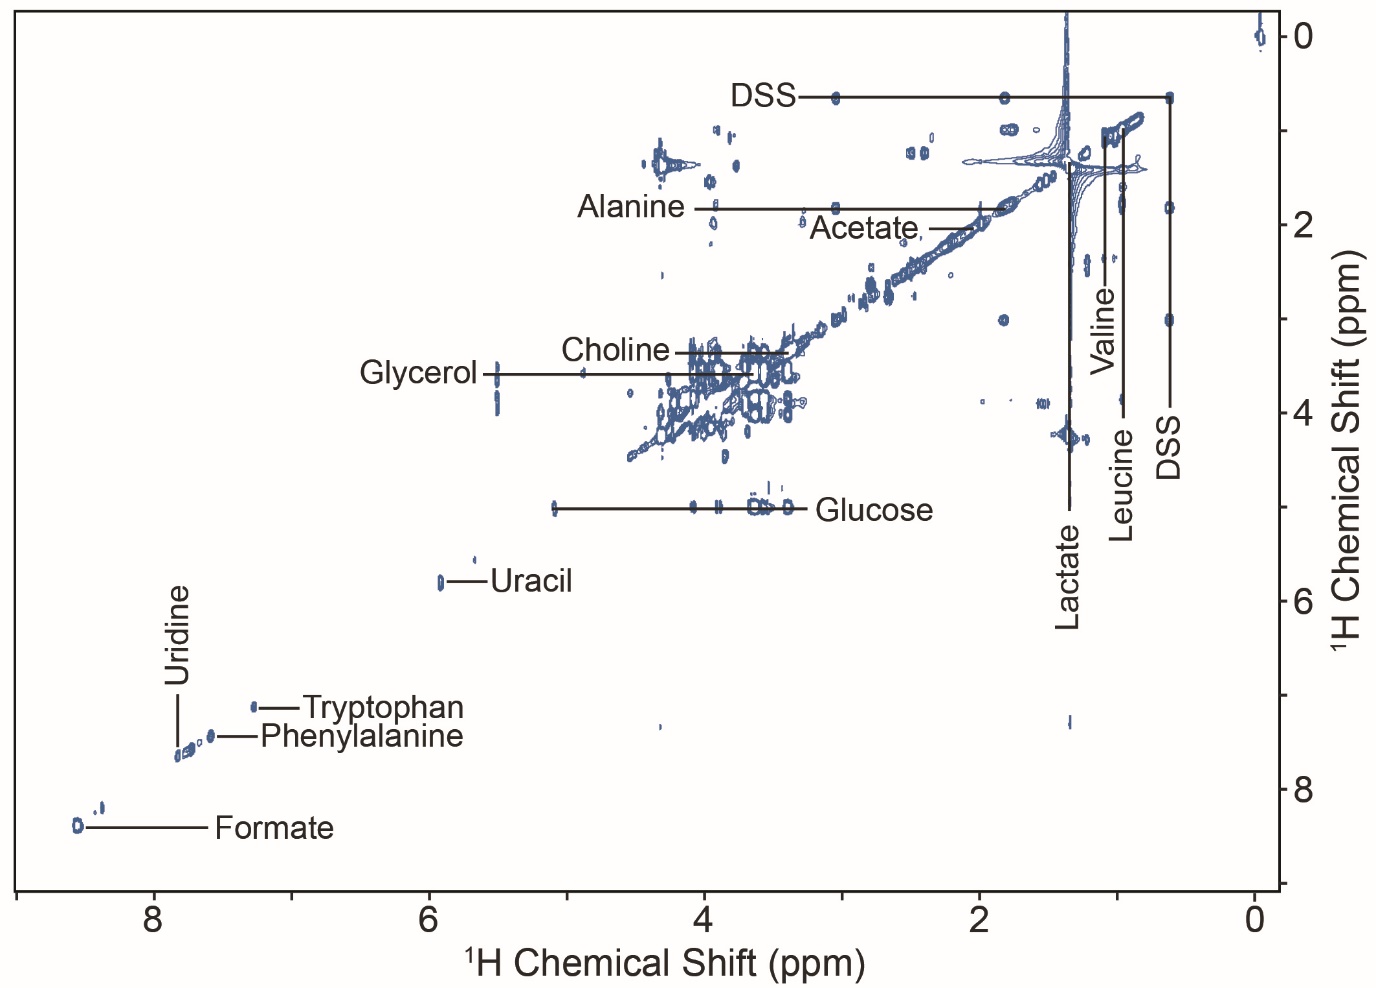
**

**Figure S3**:Comparison of the 1D 1H NMR spectra (1-5 ppm) of serum metabolites obtained from control mice (0 injections; Red); with mice that received 1 STZ injection (Green); 2 STZ injections (Royal blue); 3 STZ injections (Cyan); 4 STZ injections (Purple); and 5 STZ injections (Yellowish brown) A) 15 days, and B) 60 days after the STZ-intervention.

**
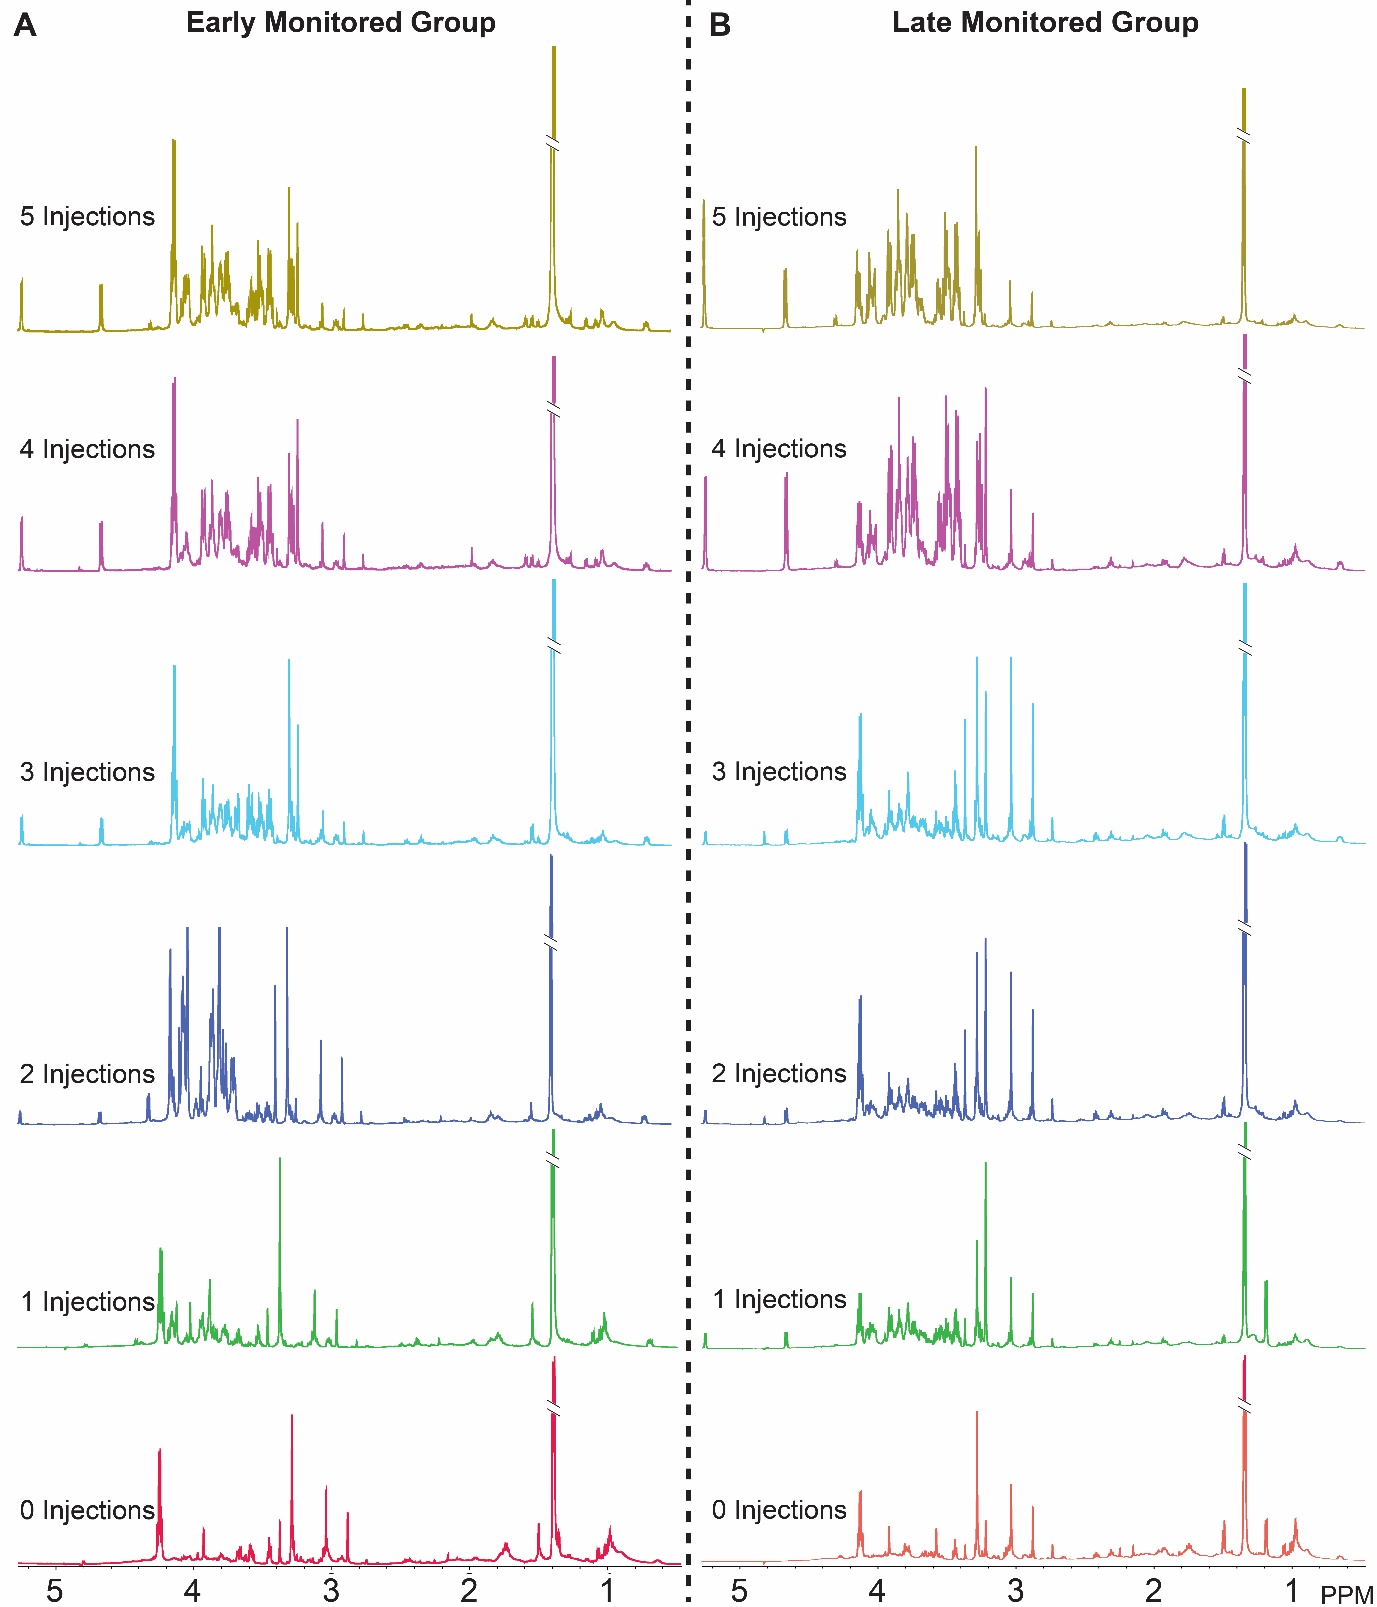
**

**Figure S4**:Scores plots generated from the PLS-DA model for the comparison of metabolic profiles obtained from serum samplesof control (0I; Red) when compared to mice receiving increasing numbers of STZ injections (Green – 1I, Blue – 2I, Cyan – 3I, Purple – 4I and Yellow – 5I), 15-days (early) (A) and 60-days (late) (B) post-STZ-intervention. Each data point represents an individual sample, and the colored ellipses represent the 95% confidence intervals for each group (N = 8).

**
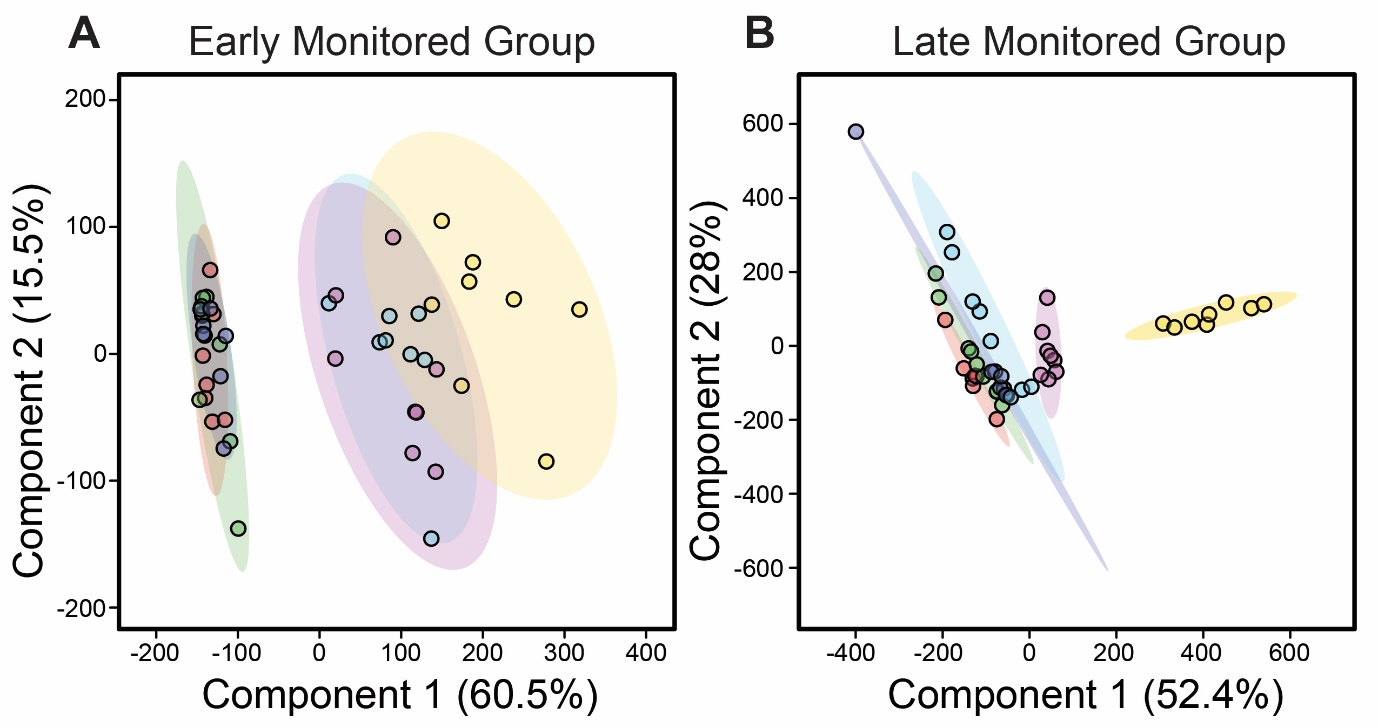
**

**Figure S5**:Box-whiskers plots displaying relative normalized concentrations of significantly altered metabolites identified using a cut-off of p-values and FDR values ≤ 0.05. Panels comparing the identified significantly perturbed metabolites while comparing (A) 0I vs 3I, (B) 0I vs. 4I, and (C) 0I vs. 5I mice, monitored for 15-days after STZ-intervention (early time point) have been represented.


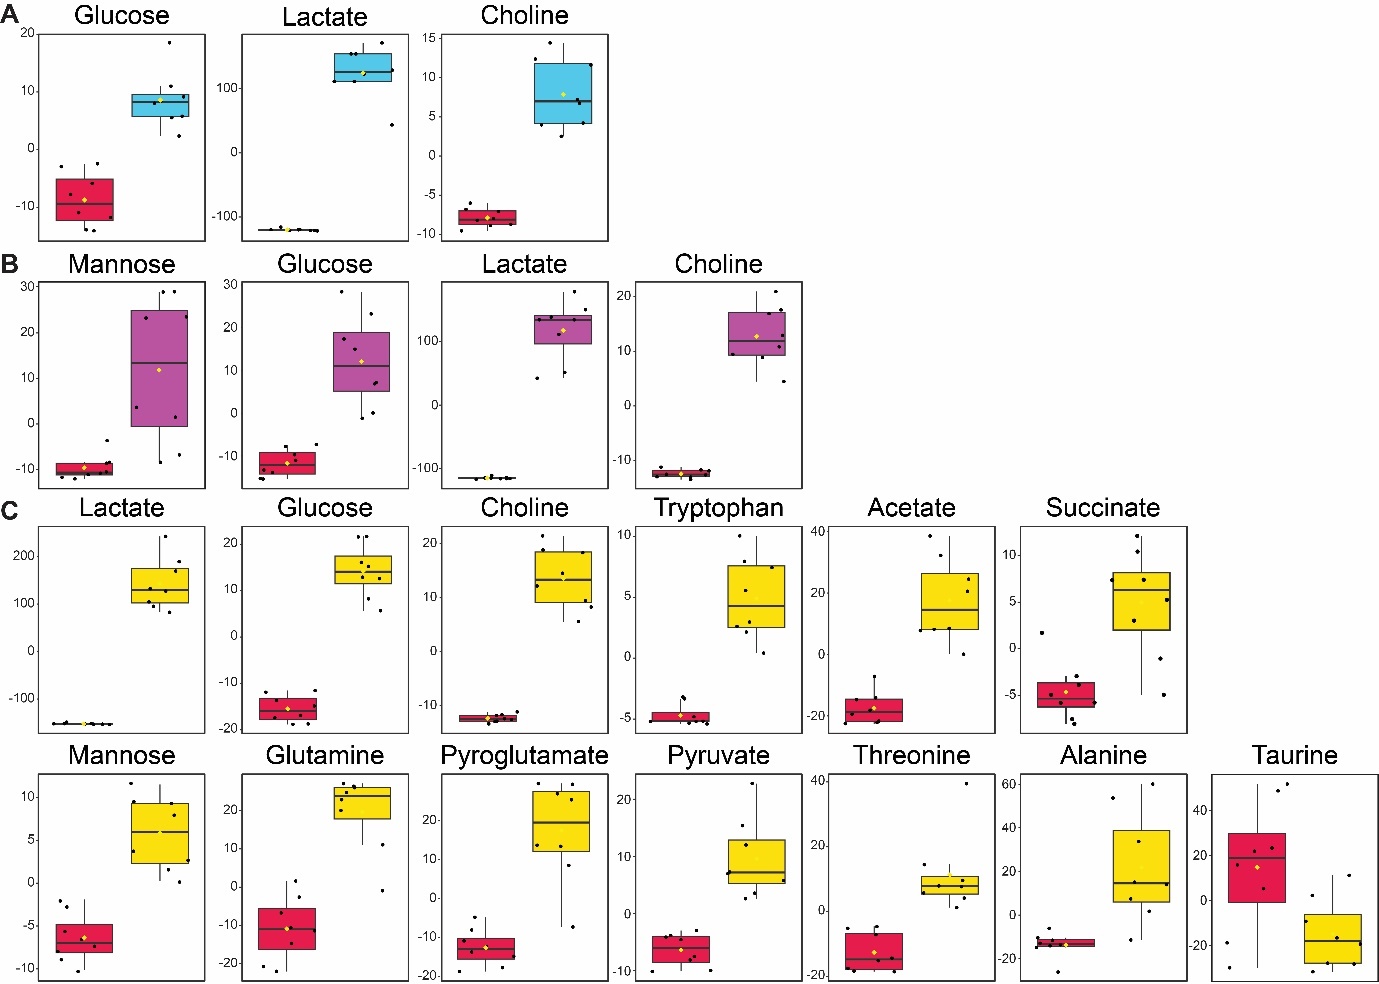


**Figure S6**:Box-whiskers plots displaying relative normalized concentrations of significantly altered metabolites identified from p-value ≤ 0.05 and FDR ≤ 0.05. Panels comparing significantly perturbed metabolites while comparing (A) 0I vs. 5I, (B) 0I vs. 4I, (C) 0I vs. 3I, and (D) 0I vs. 2I mice, monitored for 60-days (late time-point) after STZ-intervention have been represented.


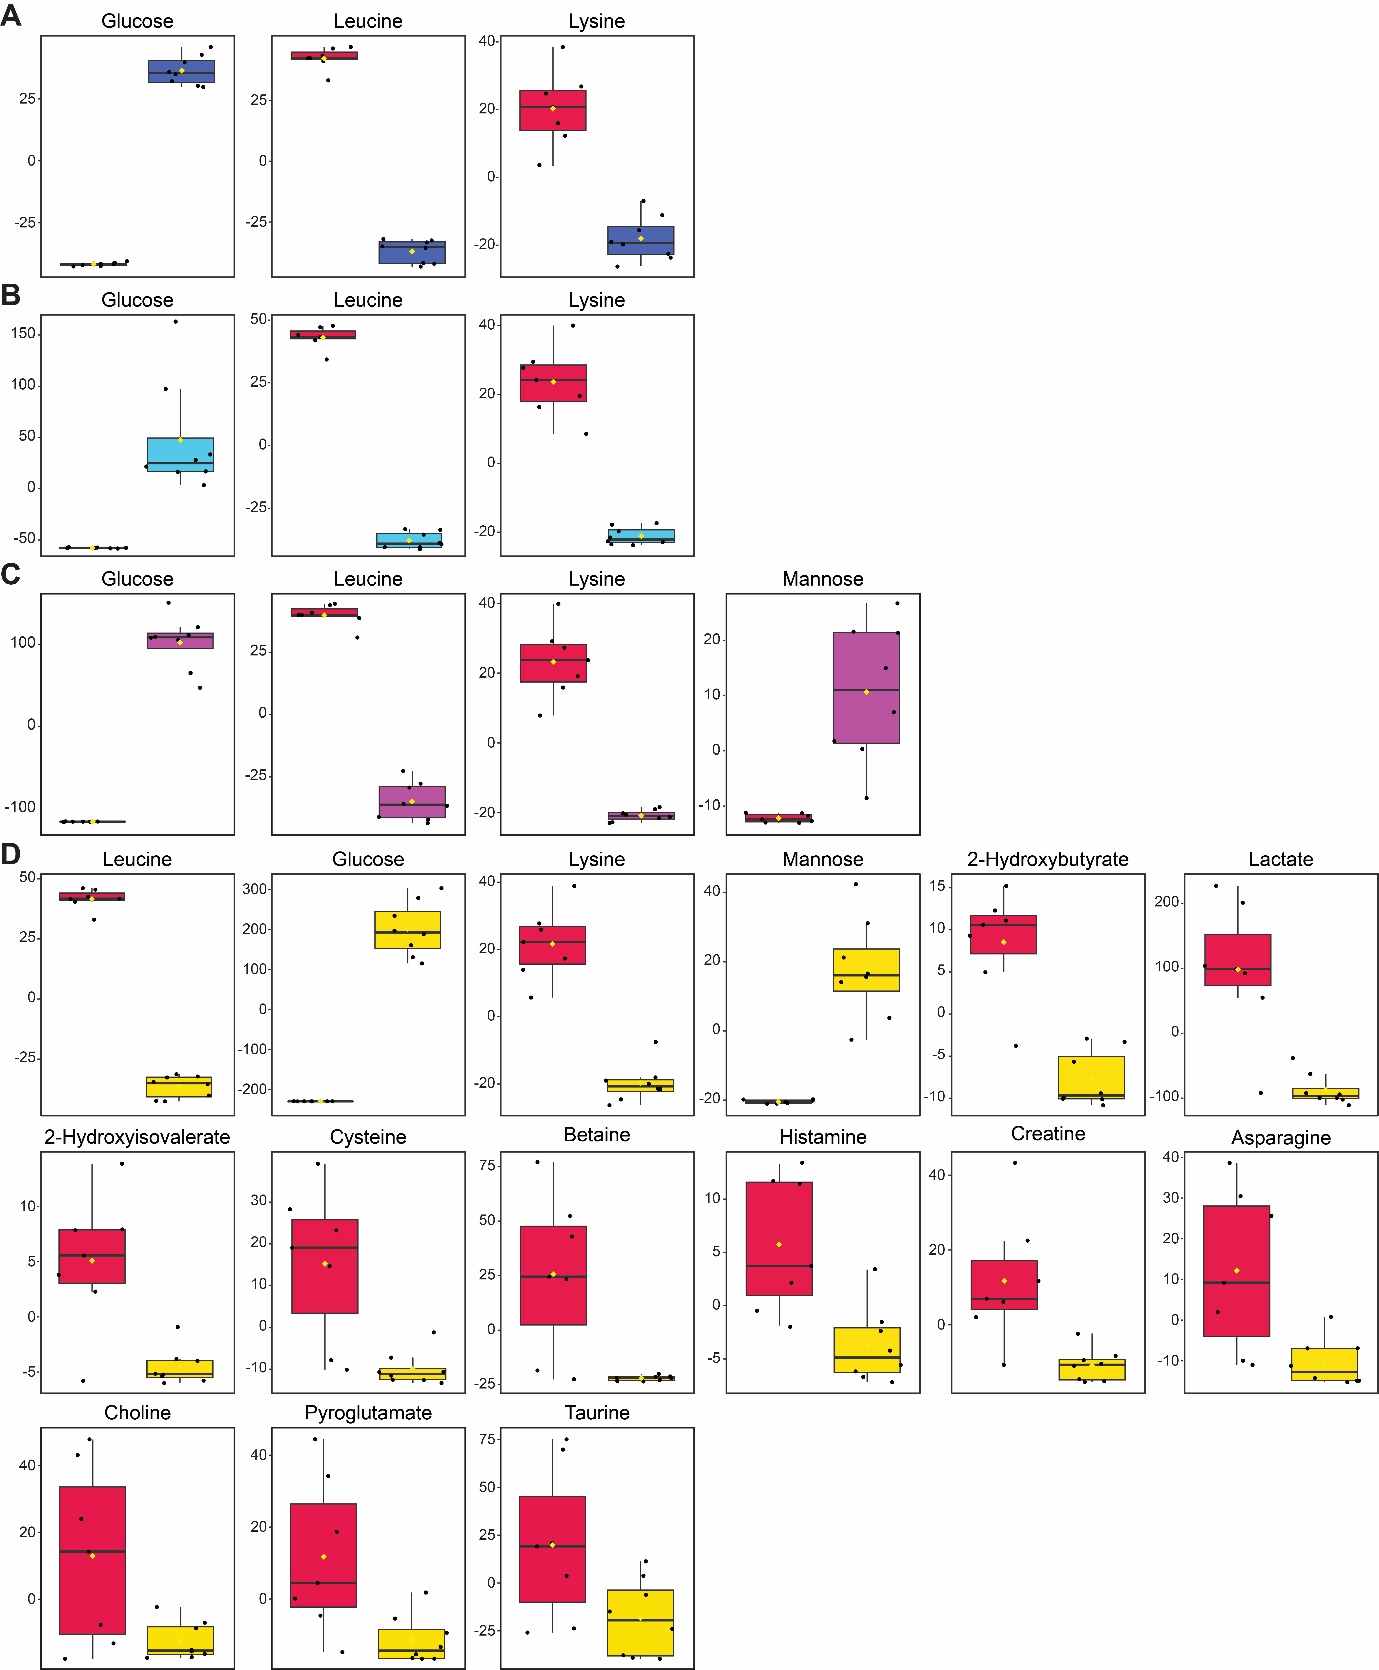


**Table S1**: Average body weight (in gms) for the mice subgroups used for the early (15-days post-STZ intervention) and late (60-days post-STZ intervention) time points. I: Injection.

| **15-days** | **Week 1** | **Week 2** | **Week 3** |
| --- | --- | --- | --- |
| **Control (0I)** | 21 | 21.6 | 21.83 |
| **1I** | 23.14 | 23.76 | 23.17 |
| **2I** | 25.05 | 25.02 | 26.17 |
| **3I** | 23.96 | 23.6 | 24.82 |
| **4I** | 23.92 | 23.48 | 25.1 |
| **5I** | 26.28 | 24.85 | 27.3 |

| **60-days** | **Week 1** | **Week 2** | **Week 3** | **Week 4** | **Week 5** | **Week 6** |
| --- | --- | --- | --- | --- | --- | --- |
| **Control (0I)** | 25.08 | 26.46 | 26.98 | 27.76 | 27.48 | 28.92 |
| **1I** | 25.82 | 26.72 | 25.88 | 26.83 | 25.1 | 26.4 |
| **2I** | 26.54 | 27.58 | 27. 98 | 28.64 | 29.8 | 29.77 |
| **3I** | 24 | 23.73 | 25.05 | 25.33 | 25.33 | 26.7 |
| **4I** | 23.73 | 23.08 | 23.37 | 23.63 | 23.6 | 23.5 |
| **5I** | 23.77 | 21.97 | 23.03 | 22.7 | 23.05 | 22.88 |

**Table S2:** Average feed intake (in gms) and water intake (in ml) for the mice subgroups used for the early (15-days post-STZ intervention) and late (60-days post-STZ intervention) time points. I: Injection.

| **Feed intake in the 15-days post STZ intervention Group** | |
| --- | --- |
| **Control (0I)** | 446.4 |
| **1I** | 440.4 |
| **2I** | 475.7 |
| **3I** | 433.4 |
| **4I** | 455.9 |
| **5I** | 483.6 |
|  | |
| **60-days post STZ intervention Group** | |
| **Control (0I)** | 1818 |
| **1I** | 1834.5 |
| **2I** | 1792 |
| **3I** | 1799.5 |
| **4I** | 1885.8 |
| **5I** | 1858.5 |

| **Water intake (in ml) in the 15-days post-STZ Intervention Group** | |
| --- | --- |
| **Control (0I)** | 460 |
| **1I** | 490 |
| **2I** | 490 |
| **3I** | 450 |
| **4I** | 480 |
| **5I** | 460 |
|  | |
| **Water intake (in ml) in the 60-days post-STZ Intervention Group** | |
| **Control (0I)** | 1160 |
| **1I** | 1130 |
| **2I** | 1190 |
| **3I** | 1160 |
| **4I** | 1110 |
| **5I** | 1170 |

**Table S3**:Blood glucose levels (in mg/dl) for the early time point (15 days) post-STZ intervention as measured by OGTT. I: Injection.

|  | **Animal no.** | **0 min.** | **15min.** | **30min.** | **45min.** | **60min.** | **90min.** | **120min.** |
| --- | --- | --- | --- | --- | --- | --- | --- | --- |
| **Control (0I)** | M7 | 118.95 | 224.25 | 159.9 | 124.15 | 134.55 | 111.15 | 117 |
| M8 | 135.2 | 229.45 | 198.25 | 160.55 | 163.15 | 141.7 | 120.25 |
| M9 | 118.3 | 255.45 | 234.65 | 148.2 | 159.9 | 146.25 | 126.75 |
| M30 | 80.6 | 195 | 170.95 | 129.35 | 131.3 | 111.15 | 105.95 |
| M31 | 114.4 | 201.5 | 178.1 | 135.85 | 139.75 | 109.2 | 115.05 |
| M32 | 108.55 | 215.15 | 191.75 | 144.95 | 140.4 | 113.1 | 112.45 |
| M54 | 91.65 | 228.8 | 120.25 | 116.35 | 117.65 | 102.7 | 91 |
| M55 | 102.05 | 204.75 | 147.55 | 131.95 | 132.6 | 107.9 | 84.5 |
| **1I** | M16 | 139.1 | 228.15 | 209.3 | 166.4 | 170.95 | 143 | 132.6 |
| M17 | 131.95 | 213.2 | 185.25 | 155.35 | 144.3 | 120.25 | 115.7 |
| M18A | 146.25 | 258.7 | 193.7 | 157.95 | 161.85 | 131.95 | 126.75 |
| M18B | 110.5 | 201.5 | 211.9 | 195 | 166.4 | 135.85 | 129.35 |
| M19 | 130.65 | 265.2 | 263.9 | 178.75 | 185.25 | 143.65 | 161.2 |
| M33 | 155.35 | 187.85 | 214.5 | 190.45 | 184.6 | 144.95 | 131.3 |
| M71 | 109.2 | 211.9 | 155.35 | 139.1 | 138.45 | 111.15 | 94.25 |
| M72 | 105.3 | 215.15 | 190.45 | 177.45 | 176.15 | 135.2 | 118.3 |
| **2I** | M10 | 130.65 | 215.15 | 257.4 | 210.6 | 167.05 | 111.8 | 108.55 |
| M11 | 117.65 | 203.45 | 223.6 | 199.55 | 152.1 | 111.15 | 106.6 |
| M12 | 87.75 | 219.05 | 212.55 | 153.4 | 133.25 | 110.5 | 97.5 |
| M13 | 113.75 | 230.75 | 241.8 | 221 | 176.8 | 142.35 | 124.8 |
| M14 | 126.75 | 228.8 | 209.95 | 184.6 | 170.3 | 133.25 | 128.05 |
| M31 | 175.5 | 253.5 | 248.3 | 228.15 | 242.45 | 184.6 | 151.45 |
| M67 | 131.3 | 280.8 | 186.55 | 172.25 | 169 | 132.6 | 122.85 |
| M68 | 117.65 | 264.55 | 245.05 | 221 | 206.05 | 170.95 | 128.05 |
| **3I** | M1 | 135.85 | 235.3 | 244.4 | 204.1 | 189.8 | 139.1 | 113.1 |
| M2 | 171.6 | 320.45 | 328.9 | 283.4 | 252.85 | 200.85 | 157.95 |
| M3 | 163.15 | 310.7 | 343.2 | 300.3 | 243.75 | 224.25 | 202.15 |
| M4 | 195.65 | 293.8 | 344.5 | 364 | 318.5 | 241.15 | 217.75 |
| M5 | 139.75 | 258.7 | 265.85 | 251.55 | 208.65 | 155.35 | 111.15 |
| M29 | 156 | 258.7 | 315.25 | 307.45 | 281.45 | 246.35 | 164.45 |
| M62 | 156.65 | 390 | 373.1 | 321.1 | 316.55 | 241.8 | 176.8 |
| M63 | 167.05 | 321.1 | 349.05 | 319.8 | 305.5 | 254.15 | 189.15 |
| **4I** | M39 | 297.05 | 390 | 388.7 | 388.05 | 335.4 | 297.05 | 254.8 |
| M40 | 161.2 | 330.85 | 385.45 | 373.75 | 332.15 | 261.3 | 234 |
| M41 | 226.2 | 347.75 | 383.5 | 350.35 | 330.2 | 265.2 | 245.05 |
| M42 | 154.05 | 306.8 | 365.3 | 351 | 337.35 | 338 | 240.5 |
| M43 | 303.55 | 390 | 390 | 390 | 386.75 | 303.55 | 232.7 |
| M27 | 128.05 | 306.8 | 271.7 | 254.8 | 244.4 | 211.9 | 170.95 |
| M58 | 206.05 | 390 | 390 | 380.9 | 372.45 | 314.6 | 253.5 |
| M59 | 166.4 | 390 | 355.55 | 326.95 | 295.1 | 254.8 | 232.7 |
| **5I** | M20 | 238.55 | 390 | 390 | 390 | 380.9 | 295.75 | 271.7 |
| M21 | 213.85 | 342.55 | 390 | 382.2 | 362.7 | 275.6 | 256.1 |
| M22 | 332.15 | 390 | 390 | 390 | 390 | 390 | 390 |
| M23 | 309.4 | 390 | 390 | 390 | 390 | 390 | 386.75 |
| M24 | 212.55 | 344.5 | 349.7 | 346.45 | 347.75 | 321.75 | 265.85 |
| M25 | 327.6 | 390 | 390 | 390 | 390 | 380.25 | 287.3 |
| M50 | 301.6 | 390 | 390 | 377.65 | 340.6 | 295.75 | 255.45 |
| M51 | 326.95 | 390 | 390 | 390 | 355.55 | 282.1 | 243.75 |

**Table S4**:Blood glucose levels (in mg/dl) for the late time point (60 days) post-STZ intervention as measured by OGTT. I: Injection.

|  | **Animal no.** | **0 min.** | **15min.** | **30min.** | **45min.** | **60min.** | **90min.** | **120min.** |
| --- | --- | --- | --- | --- | --- | --- | --- | --- |
| **Control (0I)** | M1 | 94.9 | 203.45 | 144.3 | 122.2 | 119.6 | 92.95 | 97.5 |
| M2 | 95.55 | 179.4 | 132.6 | 118.95 | 126.75 | 96.2 | 83.2 |
| M3 | 103.35 | 176.8 | 117 | 117.65 | 128.05 | 110.5 | 79.95 |
| M4 | 108.55 | 207.35 | 129.35 | 123.5 | 137.8 | 120.25 | 87.1 |
| M5 | 100.1 | 195 | 165.75 | 132.6 | 142.35 | 117.65 | 100.75 |
| M33 | 111.15 | 197.6 | 172.25 | 98.15 | 104.65 | 88.4 | 87.1 |
| M56 | 104.65 | 196.95 | 172.25 | 177.45 | 170.3 | 157.3 | 129.35 |
| M57 | 98.8 | 178.75 | 113.1 | 135.2 | 129.35 | 128.05 | 102.7 |
| **1I** | M34 | 79.3 | 191.75 | 135.2 | 94.25 | 92.3 | 101.4 | 87.1 |
| M35 | 104 | 209.95 | 167.7 | 109.85 | 117.65 | 105.95 | 96.85 |
| M36 | 115.7 | 218.4 | 163.8 | 106.6 | 105.95 | 105.3 | 102.7 |
| M37 | 88.4 | 190.45 | 130.65 | 92.3 | 115.05 | 102.7 | 100.1 |
| M38 | 71.5 | 221.65 | 112.45 | 82.55 | 112.45 | 99.45 | 74.75 |
| M34 | 115.7 | 244.4 | 207.35 | 143.65 | 150.8 | 125.45 | 135.2 |
| M73 | 117 | 263.25 | 259.35 | 152.75 | 139.75 | 145.6 | 133.25 |
| M74 | 109.85 | 187.85 | 230.75 | 152.1 | 128.05 | 150.15 | 148.85 |
| **2I** | M15 | 114.4 | 195 | 173.55 | 126.1 | 121.55 | 99.45 | 114.4 |
| M16 | 117 | 174.85 | 157.95 | 131.95 | 131.95 | 103.35 | 111.15 |
| M17 | 104 | 193.7 | 157.95 | 112.45 | 122.2 | 80.6 | 94.25 |
| M49 | 89.05 | 211.9 | 182 | 122.2 | 120.25 | 78 | 77.35 |
| M50 | 118.95 | 220.35 | 229.45 | 177.45 | 162.5 | 104.65 | 109.85 |
| M32 | 135.2 | 308.75 | 273 | 252.2 | 240.5 | 183.3 | 159.9 |
| M69 | 191.75 | 196.95 | 274.95 | 260.65 | 213.85 | 183.95 | 146.25 |
| M70 | 152.1 | 339.95 | 361.4 | 361.4 | 334.75 | 310.05 | 264.55 |
| **3I** | M6 | 143.65 | 357.5 | 334.1 | 291.85 | 292.5 | 212.55 | 206.05 |
| M7 | 130 | 206.7 | 178.1 | 150.8 | 152.1 | 115.7 | 111.15 |
| M8 | 109.2 | 195.65 | 191.75 | 137.15 | 150.8 | 106.6 | 111.8 |
| M9 | 120.25 | 309.4 | 300.3 | 237.25 | 200.2 | 130.65 | 122.2 |
| M30 | 145.6 | 306.15 | 332.15 | 288.6 | 295.1 | 221 | 167.7 |
| M64 | 213.85 | 263.9 | 254.8 | 202.8 | 182.65 | 153.4 | 125.45 |
| M65 | 236.6 | 390 | 347.75 | 390 | 348.4 | 353.6 | 320.45 |
| M66 | 200.85 | 372.45 | 390 | 337.35 | 338 | 328.25 | 309.4 |
| **4I** | M44 | 316.55 | 390 | 390 | 359.45 | 352.3 | 302.25 | 267.15 |
| M45 | 222.3 | 390 | 363.35 | 309.4 | 276.25 | 250.25 | 186.55 |
| M46 | 301.6 | 390 | 390 | 390 | 325.65 | 285.35 | 282.75 |
| M47 | 299 | 390 | 390 | 377 | 367.25 | 334.75 | 262.6 |
| M48 | 326.95 | 390 | 390 | 390 | 390 | 363.35 | 308.1 |
| M28 | 170.95 | 338.65 | 390 | 390 | 335.4 | 276.9 | 234 |
| M60 | 282.1 | 390 | 390 | 390 | 372.45 | 377.65 | 312.65 |
| M61 | 221 | 341.25 | 333.45 | 390 | 371.8 | 358.15 | 323.05 |
| **5I** | M25 | 271.7 | 390 | 387.4 | 340.6 | 299.65 | 251.55 | 267.8 |
| M26 | 297.7 | 390 | 390 | 361.4 | 312.65 | 293.15 | 344.5 |
| M27 | 266.5 | 390 | 390 | 308.1 | 278.85 | 278.2 | 260.65 |
| M28 | 390 | 390 | 390 | 390 | 390 | 369.2 | 390 |
| M29 | 390 | 390 | 390 | 390 | 390 | 383.5 | 386.1 |
| M26 | 150.8 | 390 | 390 | 328.9 | 324.35 | 287.95 | 239.2 |
| M52 | 345.8 | 390 | 390 | 390 | 390 | 390 | 390 |
| M53 | 319.8 | 390 | 390 | 390 | 390 | 390 | 390 |

**Table S5**:Blood glucose levels (in mg/dl) for the early time point (15 days) post-STZ intervention as measured by ITT. I: Injection.

|  | **Animal no.** | **0 min.** | **15min.** | **30min.** | **45min.** | **60min.** | **90min.** | **120min.** |
| --- | --- | --- | --- | --- | --- | --- | --- | --- |
| **Control (0I)** | M7 | 110.5 | 110.5 | 97.5 | 111.8 | 113.75 | 113.1 | 89.05 |
| M8 | 108.55 | 65.65 | 76.7 | 91.65 | 79.95 | 90.35 | 120.25 |
| M9 | 107.25 | 80.6 | 58.5 | 68.9 | 98.15 | 87.1 | 109.85 |
| M30 | 109.2 | 81.25 | 86.45 | 74.1 | 92.3 | 102.7 | 120.25 |
| M31 | 103.35 | 93.6 | 77.35 | 60.45 | 57.2 | 65 | 84.5 |
| M32 | 128.05 | 92.95 | 84.5 | 60.45 | 70.85 | 69.55 | 97.5 |
| M54 | 76.05 | 105.95 | 94.25 | 117.65 | 119.6 | 94.25 | 93.6 |
| M55 | 75.4 | 101.4 | 128.7 | 111.8 | 128.7 | 99.45 | 112.45 |
| **1I** | M16 | 133.9 | 89.7 | 75.4 | 79.95 | 87.75 | 95.55 | 117.65 |
| M17 | 126.75 | 100.75 | 74.75 | 73.45 | 110.5 | 110.5 | 107.25 |
| M18A | 124.15 | 88.4 | 76.05 | 68.25 | 89.05 | 88.4 | 107.9 |
| M18B | 124.15 | 106.6 | 84.5 | 97.5 | 100.75 | 110.5 | 117.65 |
| M19 | 131.3 | 135.85 | 120.25 | 137.15 | 110.5 | 137.8 | 144.3 |
| M33 | 111.8 | 79.95 | 73.45 | 79.3 | 62.4 | 70.2 | 96.2 |
| M71 | 102.7 | 61.75 | 66.95 | 97.5 | 92.3 | 91.65 | 115.7 |
| M72 | 106.6 | 81.25 | 73.45 | 102.7 | 95.55 | 94.9 | 114.4 |
| **2I** | M10 | 128.05 | 142.35 | 111.15 | 110.5 | 111.15 | 131.3 | 140.4 |
| M11 | 123.5 | 131.3 | 104 | 98.15 | 115.7 | 122.85 | 137.15 |
| M12 | 89.7 | 94.9 | 94.9 | 88.4 | 102.05 | 108.55 | 113.1 |
| M13 | 119.6 | 102.05 | 91 | 85.8 | 94.9 | 116.35 | 127.4 |
| M14 | 133.9 | 112.45 | 86.45 | 83.85 | 104.65 | 103.35 | 119.6 |
| M31 | 135.2 | 81.25 | 72.8 | 55.9 | 72.8 | 68.9 | 91.65 |
| M67 | 113.75 | 83.85 | 62.4 | 57.2 | 65.65 | 91 | 110.5 |
| M68 | 109.2 | 89.05 | 72.8 | 69.55 | 91.65 | 104.65 | 115.05 |
| **3I** | M1 | 124.15 | 118.3 | 82.55 | 78 | 105.3 | 130 | 102.05 |
| M2 | 142.35 | 149.5 | 100.1 | 115.05 | 126.75 | 139.1 | 150.15 |
| M3 | 135.85 | 180.05 | 108.55 | 113.75 | 137.8 | 162.5 | 161.2 |
| M4 | 146.9 | 151.45 | 87.1 | 107.25 | 115.7 | 173.55 | 183.3 |
| M5 | 112.45 | 135.85 | 98.8 | 100.1 | 110.5 | 141.7 | 156 |
| M29 | 92.95 | 96.2 | 73.45 | 83.85 | 89.05 | 109.85 | 150.8 |
| M62 | 157.3 | 120.25 | 96.85 | 89.05 | 107.25 | 120.25 | 136.5 |
| M63 | 194.35 | 92.95 | 76.7 | 81.25 | 77.35 | 105.3 | 107.9 |
| **4I** | M39 | 300.95 | 271.7 | 252.2 | 220.35 | 235.95 | 274.95 | 231.4 |
| M40 | 135.2 | 146.25 | 123.5 | 115.05 | 157.3 | 165.1 | 174.2 |
| M41 | 226.2 | 213.85 | 212.55 | 135.2 | 138.45 | 153.4 | 158.6 |
| M42 | 147.55 | 138.45 | 104 | 111.8 | 130 | 141.05 | 130 |
| M43 | 309.4 | 291.85 | 248.3 | 224.25 | 261.3 | 315.9 | 300.3 |
| M27 | 107.25 | 84.5 | 91 | 98.8 | 98.15 | 94.9 | 122.2 |
| M58 | 278.85 | 239.2 | 167.7 | 212.55 | 226.85 | 241.15 | 231.4 |
| M59 | 297.7 | 216.45 | 148.2 | 174.2 | 172.25 | 158.6 | 153.4 |
| **5I** | M20 | 234 | 222.95 | 195.65 | 177.45 | 172.9 | 208 | 224.25 |
| M21 | 232.7 | 217.75 | 169.65 | 154.05 | 162.5 | 228.8 | 243.75 |
| M22 | 322.4 | 326.3 | 250.25 | 219.05 | 249.6 | 278.85 | 297.7 |
| M23 | 300.3 | 329.55 | 325.65 | 295.75 | 247.65 | 289.9 | 328.25 |
| M24 | 269.1 | 252.2 | 180.7 | 146.25 | 156.65 | 152.1 | 185.9 |
| M25 | 316.55 | 298.35 | 241.8 | 241.15 | 228.8 | 276.25 | 284.05 |
| M50 | 323.7 | 202.8 | 167.7 | 165.1 | 174.2 | 191.75 | 211.25 |
| M51 | 308.75 | 281.45 | 221.65 | 254.15 | 252.85 | 260.65 | 278.85 |

**Table S6**:Blood glucose levels (in mg/dl) for the late time point (60 days) post-STZ intervention as measured by ITT. I: Injection.

|  | **Animal no.** | **0 min.** | **15min.** | **30min.** | **45min.** | **60min.** | **90min.** | **120min.** |
| --- | --- | --- | --- | --- | --- | --- | --- | --- |
| **Control (0I)** | M1 | 81.9 | 78.65 | 64.35 | 88.4 | 94.25 | 82.55 | 76.7 |
| M2 | 104.65 | 84.5 | 74.1 | 82.55 | 87.1 | 84.5 | 83.2 |
| M3 | 106.6 | 91.65 | 73.45 | 78 | 95.55 | 98.15 | 89.7 |
| M4 | 125.45 | 79.3 | 70.2 | 73.45 | 62.4 | 76.7 | 85.8 |
| M50 | 117.65 | 78 | 55.9 | 55.25 | 42.25 | 69.55 | 65.65 |
| M33 | 122.2 | 67.6 | 61.1 | 57.85 | 59.8 | 78 | 86.45 |
| M56 | 57.85 | 47.45 | 39 | 33.15 | 31.2 | 32.5 | 39 |
| M57 | 79.95 | 52.65 | 52 | 68.25 | 83.2 | 79.95 | 82.55 |
| **1I** | M34 | 85.15 | 60.45 | 50.7 | 52.65 | 59.8 | 70.2 | 76.05 |
| M35 | 96.85 | 75.4 | 59.15 | 66.3 | 55.9 | 61.75 | 78 |
| M36 | 85.8 | 64.35 | 61.75 | 65 | 53.95 | 69.55 | 70.85 |
| M37 | 89.7 | 65.65 | 52.65 | 70.85 | 65.65 | 65 | 65.65 |
| M38 | 77.35 | 46.15 | 52.65 | 61.75 | 72.8 | 83.85 | 78 |
| M34 | 95.55 | 76.7 | 72.15 | 68.25 | 66.3 | 68.9 | 74.1 |
| M73 | 95.55 | 89.05 | 58.5 | 67.6 | 65.65 | 70.2 | 80.6 |
| M74 | 91.65 | 108.55 | 82.55 | 85.8 | 90.35 | 87.1 | 88.4 |
| **2I** | M15 | 108.55 | 62.4 | 61.75 | 61.75 | 59.15 | 52.65 | 100.75 |
| M16 | 124.15 | 85.8 | 73.45 | 67.6 | 61.1 | 69.55 | 103.35 |
| M17 | 108.55 | 76.7 | 59.8 | 65.65 | 56.55 | 68.9 | 66.3 |
| M49 | 85.15 | 51.35 | 49.4 | 54.6 | 56.55 | 79.95 | 72.8 |
| M50 | 109.2 | 115.05 | 84.5 | 94.9 | 97.5 | 88.4 | 89.05 |
| M32 | 116.35 | 81.25 | 79.95 | 76.05 | 77.35 | 87.75 | 81.25 |
| M69 | 135.2 | 148.85 | 123.5 | 101.4 | 88.4 | 81.25 | 65 |
| M70 | 152.1 | 154.7 | 106.6 | 93.6 | 105.3 | 143 | 128.05 |
| **3I** | M6 | 138.45 | 118.3 | 70.85 | 59.15 | 74.1 | 66.95 | 71.5 |
| M7 | 123.5 | 78.65 | 58.5 | 70.2 | 65 | 100.1 | 83.85 |
| M8 | 117.65 | 77.35 | 61.75 | 48.1 | 104 | 70.85 | 57.85 |
| M9 | 138.45 | 81.9 | 91.65 | 71.5 | 84.5 | 96.85 | 121.55 |
| M30 | 111.8 | 96.2 | 70.85 | 67.6 | 61.75 | 56.55 | 55.9 |
| M64 | 96.2 | 51.35 | 72.15 | 65.65 | 92.95 | 78 | 112.45 |
| M65 | 272.35 | 246.35 | 203.45 | 207.35 | 226.2 | 294.45 | 324.35 |
| M66 | 213.85 | 217.1 | 185.25 | 83.85 | 76.7 | 70.2 | 70.85 |
| **4I** | M44 | 232.7 | 269.1 | 134.55 | 92.95 | 106.6 | 111.15 | 130.65 |
| M45 | 165.1 | 169 | 90.35 | 91 | 99.45 | 105.95 | 131.3 |
| M46 | 266.5 | 286.65 | 175.5 | 146.9 | 166.4 | 183.3 | 208 |
| M47 | 354.9 | 390 | 390 | 390 | 390 | 382.85 | 330.2 |
| M48 | 331.5 | 349.05 | 266.5 | 165.1 | 159.25 | 163.8 | 183.95 |
| M28 | 165.1 | 174.85 | 99.45 | 87.1 | 79.3 | 96.2 | 96.85 |
| M60 | 291.85 | 247.65 | 229.45 | 167.7 | 161.2 | 213.85 | 216.45 |
| M61 | 227.5 | 217.75 | 161.2 | 121.55 | 107.25 | 148.85 | 199.55 |
| **5I** | M25 | 288.6 | 321.75 | 207.35 | 169.65 | 139.75 | 156.65 | 185.9 |
| M26 | 280.8 | 326.95 | 243.1 | 147.55 | 123.5 | 120.25 | 136.5 |
| M27 | 264.55 | 209.3 | 108.55 | 96.85 | 79.3 | 90.35 | 85.8 |
| M28 | 322.4 | 384.15 | 377.65 | 354.9 | 323.7 | 286.65 | 286 |
| M29 | 304.85 | 335.4 | 238.55 | 137.15 | 107.25 | 97.5 | 113.1 |
| M26 | 122.2 | 121.55 | 83.2 | 59.15 | 70.2 | 81.25 | 76.05 |
| M52 | 389.35 | 299.65 | 259.35 | 224.25 | 209.95 | 224.25 | 226.2 |
| M53 | 274.95 | 241.8 | 251.55 | 250.25 | 242.45 | 231.4 | 215.8 |

**Table S7**: **-** List of chemical shift assignment of the abundant, aqueous metabolites obtained from the serum of C57BL/6 mice.

| **S. No.** | **Metabolite**  **(PubChem CID Code)** | **Chemical shift (multiplicity)** | **Assignment** |
| --- | --- | --- | --- |
| 1 | 2-hydroxybutyrate (440864) | 0.9(t) | C4H9 |
|  |  | 1.6(m) | C2H3 |
|  |  | 1.7(m) | CH3 |
|  |  | 4.0(t) | CH3OH |
| 2 | 2-hydroxyisovalerate (99823) | 0.8(d) | C4H9 |
|  |  | 0.96(d) | C3H6 |
| 3 | 3-hydroxybutyrate (3541112) | 1.2(td) | C4H9 |
|  |  | 2.3(q) | C2H3 |
|  |  | 2.4(q) | CH3 |
|  |  | 4.14(t) | CH3OH |
| 4 | Acetate (175) | 1.90 (s) | CH3 |
| 5 | Alanine (5950) | 3.805 (q) | α-CH |
|  |  | 1.46 (d) | β-CH3 |
| 6 | Asparagine (6267) | 2.84 (m) | β-CH2 |
|  |  | 2.94 (m) | β-CH2 |
|  |  | 3.99 (dd) | α-CH |
| 7 | Aspartate (5960) | 2.66 (dd) | β-CH2 |
|  |  | 2.79 (dd) | β-CH2 |
|  |  | 3.916 (dd) | α-CH |
| 8 | Betaine (247) | 3.89 (s) | CH2 |
|  |  | 3.25 (s) | NCH3 |
| 9 | Choline (305) | 3.2 (s) | N(CH3)3 |
|  |  | 3.52 (m) | NCH2 |
|  |  | 4.06 (m) | OCH2 |
| 10 | Citrate (311) | 2.67 (d) | CH2 |
|  |  | 2.76 (d) | CH2 |
|  |  | 2.36 (s) | C3H6 |
| 11 | Creatine (586) | 3.02 (s) | CH3 |
|  |  | 3.90 (s) | CH2 |
| 12 | Cysteine ([5862](https://pubchem.ncbi.nlm.nih.gov/compound/5862)) | 3.0(dd) | CH3 |
|  |  | 3.1(dd) | CH3 |
|  |  | 4.0(t) | C2H3 |
| 13 | DSS (74873) | 0 | Si(CH3)3 |
|  |  | 0.62 (t) | γ-CH2 |
|  |  | 1.75 (m) | β-CH2 |
|  |  | 2.91 (t) | α-CH2 |
| 14 | Ethanol (702) | 1.18 (t) | CH3 |
|  |  | 3.64 (q) | CH2 |
| 15 | Ethanolamine (700) | 3.81(q) | CH3 |
|  |  | 3.13(q) | CH2 |
| 16 | Formate (283) | 8.44 (s) | CH |
| 17 | Fumarate (5460307) | 6.50 (s) | CH |
| 18 | Glucose (10954115) | 3.233 (dd) | CHOH |
|  |  | 3.398 (m) | CHOH |
|  |  | 3.458 (m) | C2H4O |
|  |  | 3.524 (dd) | CHOH |
|  |  | 3.728 (m) | CHOH |
|  |  | 3.824 (m) | CH2OH |
|  |  | 3.889 (dd) | CH2OH |
|  |  | 4.634 (d) | CHOH |
|  |  | 5.223 (d) | CHOH |
| 19 | Glutamate (33032) | 2.03 (m) | β-CH2 |
|  |  | 2.10 (m) | β-CH2 |
|  |  | 2.34 (m) | γ-CH2 |
|  |  | 3.75 (dd) | α-CH |
| 20 | Glutamine (5961) | 2.14 (m) | β-CH2 |
|  |  | 2.459 (m) | γ-CH2 |
|  |  | 3.76 (t) | α-CH |
| 21 | Glutathione (124886) | 4.56 (q) | C3H |
|  |  | 3.78 (m) | C11H |
|  |  | 2.97 (dd) | C2H |
|  |  | 2.54 (m) | C9H |
|  |  | 2.15 (m) | C10H |
| 22 | Glycerol (753) | 3.55 (dd) | CH2 |
|  |  | 3.64 (dd) | CH2 |
|  |  | 3.77 (dd) | CH2 |
| 23 | Glycine (750) | 3.56 (s) | CH2 |
| 24 | Histamine ([774](https://pubchem.ncbi.nlm.nih.gov/compound/774)) | 7.89 (s) | CH |
|  |  | 7.35 (s) | NCH |
|  |  | 3.3 (t) | CH2NH2 |
|  |  | 3.0 (t) | CH2 |
| 25 | Histidine (6274) | 7.894 (s) | C2H |
|  |  | 7.22 (s) | C5H |
|  |  | 3.98 (dd) | α-CH |
|  |  | 3.21 (dd) | β-CH2 |
|  |  | 3.11 (dd) | β-CH2 |
| 26 | Imidazole (795) | 7.98 (s) | α-CH |
|  |  | 7.28 (s) | β-CH |
| 27 | Isobutyrate ([6590](https://pubchem.ncbi.nlm.nih.gov/compound/6590)) | 2.4 (m) | CH3 |
|  |  | 1.01 (d) | C3H7 |
| 28 | Isoleucine (6306) | 0.926 (t) | δ-CH3 |
|  |  | 0.992 (d) | β-CH3 |
|  |  | 1.248 (m) | γ-CH2 |
|  |  | 1.457 (m) | γ-CH2 |
|  |  | 1.968 (m) | β-CH |
|  |  | 3.661 (d) | α-CH |
| 29 | Lactate (612) | 4.096 (q) | CH |
|  |  | 1.313 (d) | γ-CH3 |
| 30 | Leucine (6106) | 0.942 (d) | δ-CH3 |
|  |  | 0.954 (d) | δ-CH3 |
|  |  | 1.68 (m) | β-CH2 |
|  |  | 1.70 (m) | γ-CH |
|  |  | 3.71 (t) | α-CH |
| 31 | Lysine (5962) | 1.44 (m) | ϒ-CH2 |
|  |  | 1.72 (q) | δ-CH2 |
|  |  | 1.90 (m) | β-CH2 |
|  |  | 3.01 (t) | ε-CH2 |
|  |  | 3.75 (t) | α-CH2 |
| 32 | Mannose ([18950](https://pubchem.ncbi.nlm.nih.gov/compound/18950)) | 5.2 (s) | CHOH |
|  |  | 3.9 (m) | CH |
|  |  | 3.8 (m) | CH2 |
|  |  | 3.7(m) | OCH |
|  |  | 3.6(m) | CH |
|  |  | 3.4(m) | CHCH2OH |
| 33 | Methanol (887) | 3.34 (s) | CH3 |
| 34 | Methionine ([6137](https://pubchem.ncbi.nlm.nih.gov/compound/6137)) | 2.1(s) | CH3 |
|  |  | 2.6(t) | C3H6 |
|  |  | 3.89(t) | C4H9 |
| 35 | Myo-inositol (892) | 3.27 (t) | C5H |
|  |  | 3.54 (dd) | C1H/C3H |
|  |  | 3.62 (dd) | C4H/C6H |
|  |  | 4.05 (t) | C2H |
| 36 | o-Phosphocholine (1014) | 3.22 (s) | N(CH3)3 |
|  |  | 3.58 (m) | NCH2 |
|  |  | 4.15 (m) | OCH2 |
| 37 | Phenylalanine (6140) | 7.42 (m) | C3H/C5H |
|  |  | 7.36 (m) | C2H/C6H |
|  |  | 7.32 (m) | C4H |
|  |  | 3.98 (dd) | α-CH |
|  |  | 3.27 (m) | β-CH2 |
|  |  | 3.13 (m) | β-CH2 |
| 38 | Proline (145742) | 4.116 (t) | α-CH |
|  |  | 3.405 (m) | δ-CH2 |
|  |  | 3.33 (m) | δ-CH2 |
|  |  | 2.339 (m) | β-CH2 |
|  |  | 2.07 (m) | β-CH2 |
|  |  | 2.01 (m) | γ-CH2 |
| 39 | Pyroglutamate ([7405](https://pubchem.ncbi.nlm.nih.gov/compound/7405)) | 4.17(dd) | CH3 |
|  |  | 2.50 (m) | C2H6 |
|  |  | 2.39 (m) | C3H6 |
|  |  | 2.02 (m) | β-CH3 |
| 40 | Pyruvate (107735) | 2.36 (s) | CH2 |
| 41 | Sarcosine ([1088](https://pubchem.ncbi.nlm.nih.gov/compound/1088)) | 2.7 (s) | NHCH3 |
|  |  | 3.6 (s) | CH2COOH |
| 42 | Serine (5951) | 4.00 (dd) | CH3 |
|  |  | 3.94 (dd) | COH3 |
|  |  | 3.84 (dd) | NCH3 |
| 43 | sn-glycero-3-phosphocholine (657272) | 4.3 (s) | CH2 |
|  |  | 3.9 (m) | N(CH3)3 |
|  |  | 3.64 (dd) | CH2O |
|  |  | 3.2 (s) | C2H4O |
| 44 | Succinate (160419) | 2.385 (s) | CH |
| 45 | Taurine (1123) | 3.25 (t) | S-CH2 |
|  |  | 3.42 (t) | N-CH2 |
| 46 | Threonine (6288) | 4.24 (m) | C2H |
|  |  | 3.58 (d) | C3H |
|  |  | 1.32 (d) | CH3 |
| 47 | Trimethylamine ([1146](https://pubchem.ncbi.nlm.nih.gov/compound/1146)) | 2.9 (s) | N(CH3)3 |
| 48 | Tryptophan ([6305](https://pubchem.ncbi.nlm.nih.gov/compound/6305)) | 7.6(m) | CH |
|  |  | 3.84(t) | CH2 |
|  |  | 3.29(q) | CH3 |
| 49 | Tyrosine (6057) | 7.17 (d) | C2H/C6H |
|  |  | 6.87 (d) | C3H/C5H |
|  |  | 3.93 (dd) | α-CH |
|  |  | 3.18 (dd) | β-CH2 |
|  |  | 3.04 (dd) | β-CH2 |
| 50 | Uracil ([1174](https://pubchem.ncbi.nlm.nih.gov/compound/1174)) | 7.53(d) | C5H |
|  |  | 5.8 (d) | C6H |
| 51 | Uridine (6029) | 7.75 (m) | C11H |
|  |  | 5.89 (d) | C2H |
|  |  | 5.88 (d) | C10H |
|  |  | 4.34 (dd) | C3H |
|  |  | 4.22 (dd) | C4H |
|  |  | 4.12 (m) | C5H |
|  |  | 3.9 (dd) | C14H |
|  |  | 3.8 (dd) | C14H |
| 52 | Valine (6287) | 0.996 (d) | CH3 |
|  |  | 1.047 (d) | CH3 |
|  |  | 2.281 (m) | β-CH |
|  |  | 3.617 (d) | α-CH |

**Table S8:** List of common metabolic pathways perturbed in the mice given 5 STZ injections, 15- and 60-days post-intervention.

| **Common Pathways** | **15 Days** | | **60 Days** | |
| --- | --- | --- | --- | --- |
|  | **P-value** | **FDR** | **P-value** | **FDR** |
| Gluconeogenesis | 2.68E-09 | 2.86E-08 | 3.28E-10 | 2.26E-09 |
| Glycolysis | 2.68E-09 | 2.86E-08 | 3.28E-10 | 2.26E-09 |
| Insulin signalling | 2.68E-09 | 2.86E-08 | 3.28E-10 | 2.26E-09 |
| Glucose-alanine cycle | 3.56E-05 | 0.000127 | 3.29E-10 | 2.26E-09 |
| Galactose metabolism | 0.0003 | 0.000872 | 3.53E-10 | 2.26E-09 |
| Fructose and mannose degradation | 9.83E-06 | 3.93E-05 | 8.60E-06 | 4.59E-05 |
| Cysteine metabolism | 0.001047 | 0.002233 | 0.002543 | 0.01036 |
| Methionine metabolism | 0.00052 | 0.001281 | 0.002914 | 0.01036 |
| Betaine metabolism | 1.38E-07 | 8.83E-07 | 0.003555 | 0.011377 |
| Glutathione metabolism | 0.000465 | 0.001241 | 0.006953 | 0.020226 |
| Glycine, serine and threonine metabolism | 0.002627 | 0.004671 | 0.007679 | 0.020478 |
| Glycerolipid metabolism | 0.078401 | 0.11404 | 0.010702 | 0.024461 |
| Phospholipid biosynthesis | 7.07E-09 | 5.65E-08 | 0.014141 | 0.028283 |
